# Supplementary material for: Interior Hotspot Engineering in Ag–Au Bimetallic Nanocomposites by In Situ Galvanic Replacement Reaction for Rapid and Sensitive Surface-Enhanced Raman Spectroscopy Detection
Source: MDPI journal article supplement (doi:10.3390/ijms231911741), 2022-10-03
Supplement: s1 [file s1]

Supplementary Material

# Interior hotspot engineering in Ag–Au bimetallic nanocomposites by *in situ* galvanic replacement reaction for rapid and sensitive surface-enhanced Raman spectroscopy detection

Iris Baffour Ansah <sup>1,2</sup>, Soo Hyun Lee <sup>1</sup>, ChaeWon Mun <sup>1</sup>, Dong-Ho Kim <sup>1,2</sup> and Sung-Gyu Park <sup>1,\*</sup>

<sup>1</sup> Department of Nano-Bio Convergence, Korea Institute of Materials Science, 797 Changwondae-ro, Changwon, 51508, Republic of Korea

<sup>2</sup> Advanced Materials Engineering Division, University of Science and Technology (UST), 217 Gageong-ro, Yuseong-gu, Daejeon 34113, Republic of Korea

\* Correspondence: sgpark@kims.re.kr

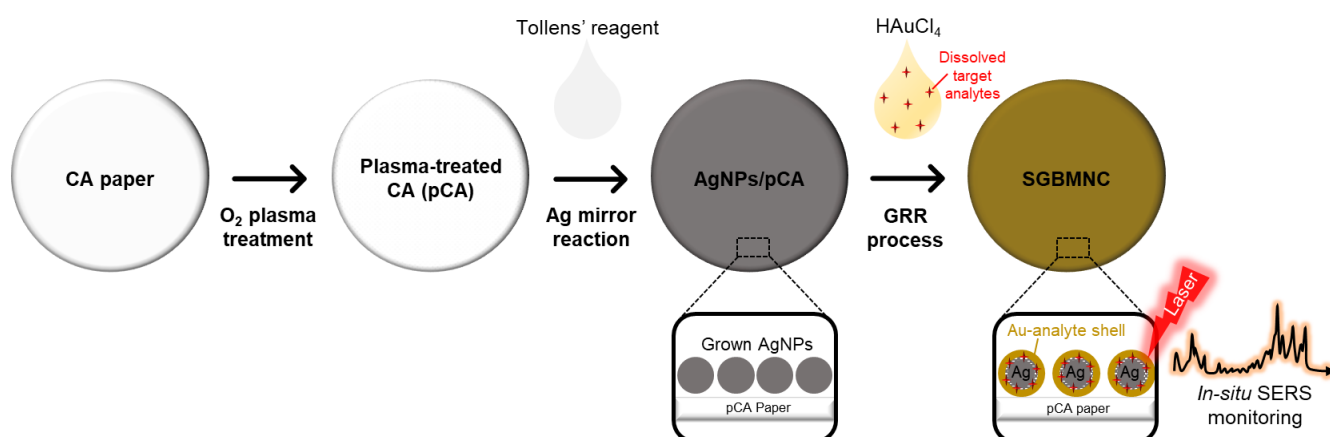

**Figure S1.** Schematic of the fabrication procedures for the SGBMNC SERS platform *via* chemical syntheses.

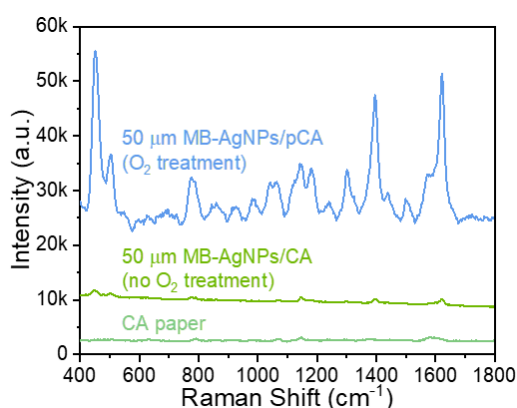

**Figure S2.** SERS spectra of the bare CA paper and the MB-attached AgNPs grown on the CA with and without oxygen plasma treatment.

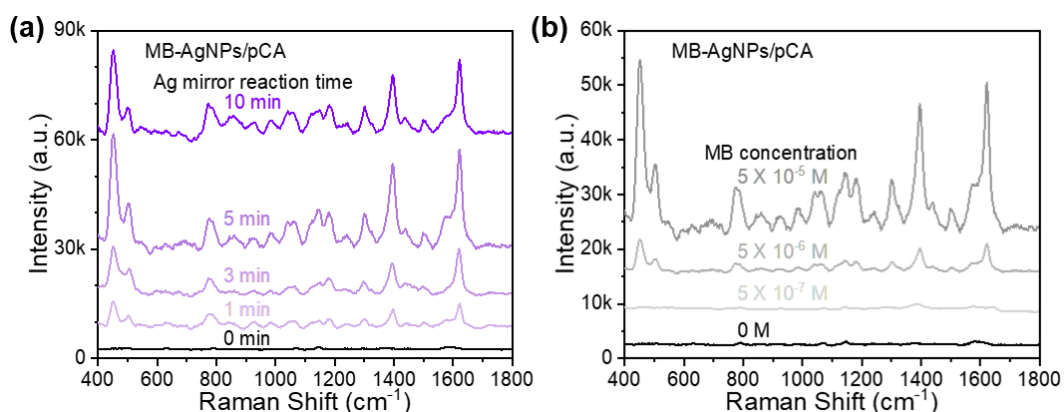

**Figure S3.** Influence of (a) the Ag mirror reaction time and (b) the molecular concentration on the SERS spectra of MB-AgNPs/pCA.

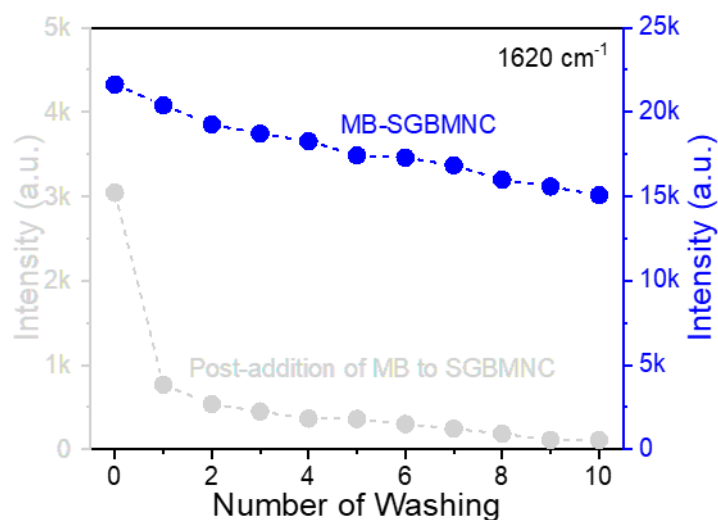

**Figure S4.** Signal variations of the post-addition of MB to SGBMNC and MB-SGBMNC during ten times washing.

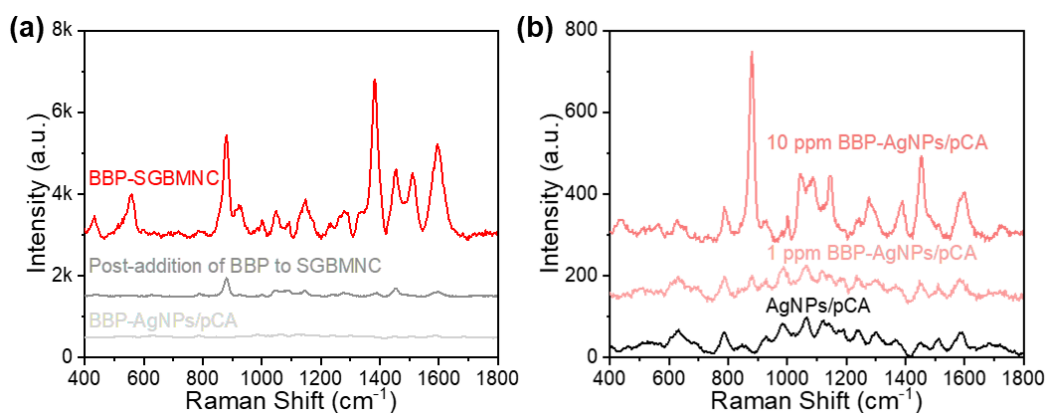

**Figure S5.** (a) SERS spectra of BBP on the platform with and without interior hotspots and (b) the sensitivity of AgNPs/pCA for BBP detection.
